# Supplementary material for: Measuring the internal quantum yield of upconversion luminescence for ytterbium-sensitized upconversion phosphors using the ytterbium(iii) emission as an internal standard
Source: Royal Society of Chemistry journal article supplement (doi:10.1039/c8nr03538e), 2018-01-01
Supplement: c8nr03538e1.pdf [file c8nr03538e1.pdf]

## Supporting Information

Measuring the Internal Quantum Yield of Upconversion Luminescence for Ytterbium-Sensitized  
Upconversion Phosphors Using the Ytterbium(III) Emission as an Internal Standard

*P. Stanley May,\* Aravind Baride, Md Yeathad Hossan, Mary Berry*  
*Department of Chemistry, University of South Dakota, Vermillion, SD, 57069*  
*\*Communicating author*

### I.) Absorbance spectrum of $\text{Yb}^{3+}:^2\text{F}_{7/2} \rightarrow ^2\text{F}_{5/2}$ transition of $\beta\text{-NaYF}_4:2\%\text{Er}, 18\%\text{Yb}$ nanocrystals in $\text{CCl}_4$

The absorbance spectrum below was used to determine the relative absorbance values 976 nm and 936 nm.  $\text{CCl}_4$  was chosen for the dispersion medium because of its excellent transparency in the NIR spectral region. Dispersions used for upconversion experiments were at lower concentrations with peak absorbance,  $A(976 \text{ nm}) < 0.004$ .

$$\frac{A(936\text{nm})}{A(976\text{nm})} = 0.143$$

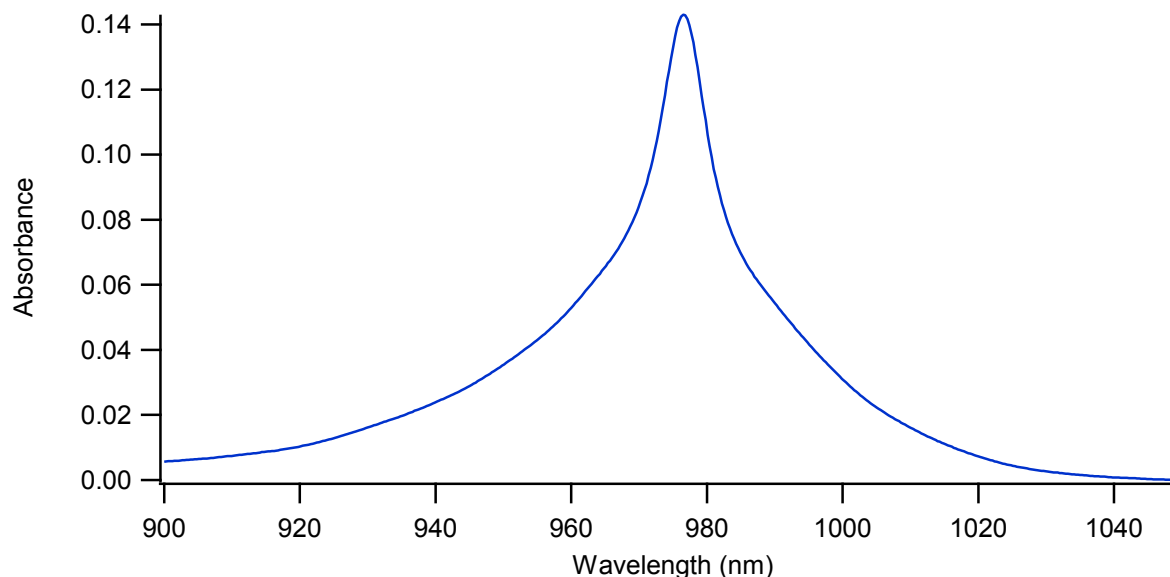

**Figure S1. Absorbance spectrum of  $\text{Yb}^{3+}:^2\text{F}_{7/2} \rightarrow ^2\text{F}_{5/2}$  transition of  $\beta\text{-NaYF}_4:2\%\text{Er}, 18\%\text{Yb}$  nanocrystals in  $\text{CCl}_4$**

## II.) Tabulated Results of the IQY measurements.

**Table S1.** IQY (%) values vs irradiance for  $\beta$ -NaYF<sub>4</sub>: 0.5%Tm, 25%Yb@ NaYF<sub>4</sub> core-shell nanoparticles dispersed in toluene

| Irradiance 936 nm (W/cm <sup>2</sup> ) | Equivalent Irradiance at 976 nm (W/cm <sup>2</sup> ) | %IQY 450nm | %IQY 474nm | %IQY 800nm | %IQY 1 $\mu$ m |
|----------------------------------------|------------------------------------------------------|------------|------------|------------|----------------|
| 547                                    | 78.2                                                 | 0.127      | 0.135      | 10.44      | 38.9           |
| 221                                    | 31.6                                                 | 0.041      | 0.074      | 9.45       | 41.6           |
| 148                                    | 21.2                                                 | 0.021      | 0.052      | 8.43       | 44.6           |
| 59                                     | 8.5                                                  | 0.005      | 0.025      | 6.26       | 52.0           |
| 28                                     | 4.0                                                  | 0.000      | 0.000      | 4.57       | 53.1           |
| 7.1                                    | 1.0                                                  | 0.000      | 0.000      | 2.66       | 58.6           |
| 3.8                                    | 0.54                                                 | 0.000      | 0.000      | 2.24       | 60.7           |

**Table S2.** IQY (%) values vs irradiance for  $\beta$ -NaYF<sub>4</sub>: 0.5%Tm, 25%Yb core nanoparticles dispersed in toluene

| Irradiance 936 nm (W/cm <sup>2</sup> ) | Equivalent Irradiance at 976 nm (W/cm <sup>2</sup> ) | %IQY 450nm | %IQY475nm | %IQY800nm | %IQY 1 $\mu$ m |
|----------------------------------------|------------------------------------------------------|------------|-----------|-----------|----------------|
| 534                                    | 76.4                                                 | 0.0343     | 0.0320    | 3.71      | 10.36          |
| 220                                    | 31.5                                                 | 0.0100     | 0.0167    | 3.09      | 11.33          |
| 145                                    | 20.7                                                 | 0.0053     | 0.0120    | 2.71      | 11.99          |
| 55                                     | 7.9                                                  | 0.0005     | 0.0042    | 1.56      | 13.85          |
| 25                                     | 3.6                                                  | 0.0000     | 0.0017    | 1.02      | 15.04          |
| 7.1                                    | 1.0                                                  | 0.0000     | 0.0000    | 0.55      | 14.86          |
| 3.5                                    | 0.50                                                 | 0.0000     | 0.0000    | 0.36      | 15.06          |

**Table S3.** IQY (%) values vs irradiance for  $\beta$ -NaYF<sub>4</sub>: 2%Er, 18%Yb@ NaYF<sub>4</sub> core-shell nanoparticles dispersed in toluene

| Irradiance 936 nm (W/cm <sup>2</sup> ) | Equivalent Irradiance at 976 nm (W/cm <sup>2</sup> ) | %IQY 408nm | %IQY 540nm | %IQY 660nm | %IQY 1 $\mu$ m | %IQY 1.5 $\mu$ m |
|----------------------------------------|------------------------------------------------------|------------|------------|------------|----------------|------------------|
| 509                                    | 72.7                                                 | 0.126      | 2.68       | 3.0        | 54.4           | 17.2             |
| 214                                    | 30.5                                                 | 0.064      | 1.96       | 1.9        | 58.6           | 16.0             |
| 140                                    | 20.0                                                 | 0.043      | 1.63       | 1.4        | 61.2           | 16.2             |
| 55                                     | 7.9                                                  | 0.013      | 1.03       | 0.65       | 66.5           | 14.6             |
| 29                                     | 4.1                                                  | 0.0000     | 0.48       | 0.18       | 74.0           | 13.4             |

**Table S4.** IQY (%) values vs irradiance for  $\beta$ -NaYF<sub>4</sub>: 2%Er, 18%Yb core nanoparticles dispersed in toluene

| Irradiance 936 nm (W/cm <sup>2</sup> ) | Equivalent Irradiance at 976 nm (W/cm <sup>2</sup> ) | %IQY 408nm | %IQY 540nm | %IQY 660nm | %IQY 1 $\mu$ m | %IQY 1.5 $\mu$ m |
|----------------------------------------|------------------------------------------------------|------------|------------|------------|----------------|------------------|
| 503                                    | 71.9                                                 | 0.0235     | 0.54       | 0.72       | 15.9           | 7.9              |
| 214                                    | 30.5                                                 | 0.0091     | 0.35       | 0.36       | 16.3           | 7.1              |
| 138                                    | 19.8                                                 | 0.0052     | 0.27       | 0.24       | 16.6           | 7.1              |
| 48                                     | 6.9                                                  | 0.0010     | 0.12       | 0.07       | 18.7           | 7.4              |
| 25                                     | 3.6                                                  | 0.0000     | 0.06       | 0.02       | 19.0           | 8.1              |

### III.) Correlation of radiative rate constants, $k_{rad}$ , for Yb<sup>3+</sup>:<sup>2</sup>F<sub>5/2</sub>→<sup>2</sup>F<sub>7/2</sub> emission with the refractive index of the crystal host.

The values of  $k_{rad}$  for Yb<sup>3+</sup> emission doped in a series of crystal hosts has been reported by Krupke,<sup>1</sup> and is tabulated below along with the refractive index of the host. We have omitted the centrosymmetric systems for which the Yb<sup>3+</sup>:<sup>2</sup>F<sub>5/2</sub> → <sup>2</sup>F<sub>7/2</sub> transition is electric-dipole forbidden.

**Table S1.** Values of  $k_{rad}$  reported by Krupke for Yb<sup>3+</sup> emission for a series of crystal hosts. The refractive index of the bulk host is also given.

| Host                                              | $k_{rad}$ (s <sup>-1</sup> ) | n     |
|---------------------------------------------------|------------------------------|-------|
| KCaF <sub>3</sub>                                 | 370                          | 1.378 |
| LiYF <sub>4</sub>                                 | 452                          | 1.455 |
| KY <sub>3</sub> F <sub>10</sub>                   | 535                          | 1.5   |
| BaY <sub>2</sub> F <sub>8</sub>                   | 490                          | 1.521 |
| LaF <sub>3</sub>                                  | 463                          | 1.597 |
| Ca <sub>5</sub> (PO <sub>4</sub> ) <sub>3</sub> F | 769                          | 1.63  |
| Y <sub>2</sub> SiO <sub>5</sub>                   | 962                          | 1.79  |
| Y <sub>3</sub> Al <sub>5</sub> O <sub>12</sub>    | 990                          | 1.82  |
| LiYO <sub>2</sub>                                 | 885                          | 1.82  |
| LuPO <sub>4</sub>                                 | 885                          | 1.83  |

Assuming a constant dipole strength for the Yb<sup>3+</sup>:<sup>2</sup>F<sub>5/2</sub>→<sup>2</sup>F<sub>7/2</sub> transition, in bulk materials  $k_{rad}$  should scale with the refractive index of the host according to<sup>2,3</sup>

$$k_{rad}(n) = k_{rad}^0 \cdot n \left( \frac{3n^2}{2n^2 + 1} \right)^2 \quad (1.)$$

where  $k_{rad}^0$  is the value of the rate constant in a vacuum. Equation 1 is linear in  $n$ , so that  $k_{rad}$  should increase linearly with increasing refractive index.

The data in Table S1 is plotted in Figure S2 in two groups, fluorides and oxides, each fit to Eq. 1, with  $k_{rad}^0$  being the only fit parameter. For the oxides,  $k_{rad}^0 = 301.2 \pm 8.2 s^{-1}$  and, for the fluorides,  $k_{rad}^0 = 206.6 \pm 9.5 s^{-1}$ . The higher  $k_{rad}^0$  for the oxides is indicative of a higher dipole strength relative to the fluorides, which is commonly attributed to a lower-lying ligand-to-metal charge transfer band in the oxides. Using the  $k_{rad}^0 = 206.2 \pm 9.5 s^{-1}$  fit value for the fluorides and the refractive index for NaYF<sub>4</sub> ( $n=1.497$ ), Equation 1 predicts  $k_{rad}=464 s^{-1}$  for Yb<sup>3+</sup> emission in a bulk NaYF<sub>4</sub> host.

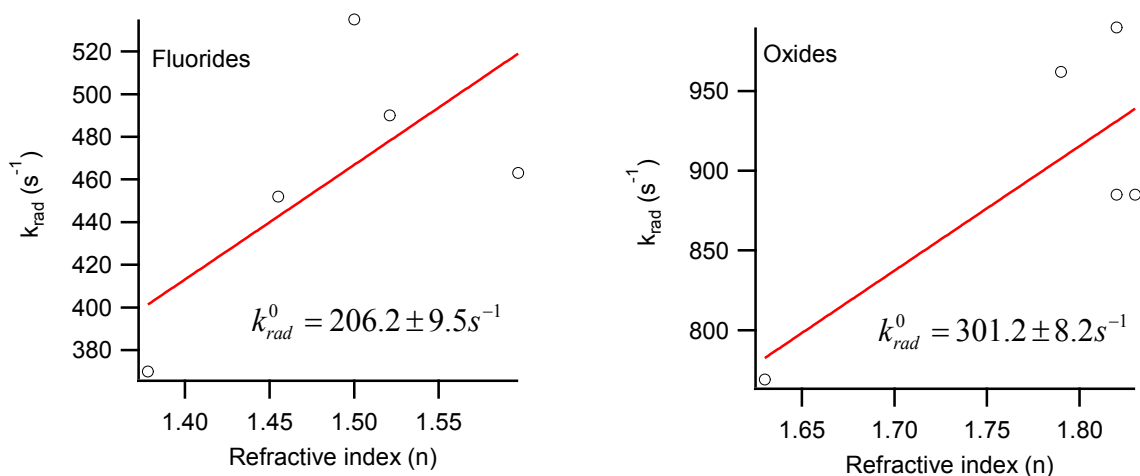

**Figure S2.** Fits of the fluoride and oxide data in Table S1 to Equation 1.

We note also that the entire data set in Table S1 can be empirically fit to a line function, as shown in Figure S3. The trend shown in Figure S3 would predict  $k_{rad}=498 s^{-1}$  for Yb<sup>3+</sup> emission in a bulk NaYF<sub>4</sub> host.

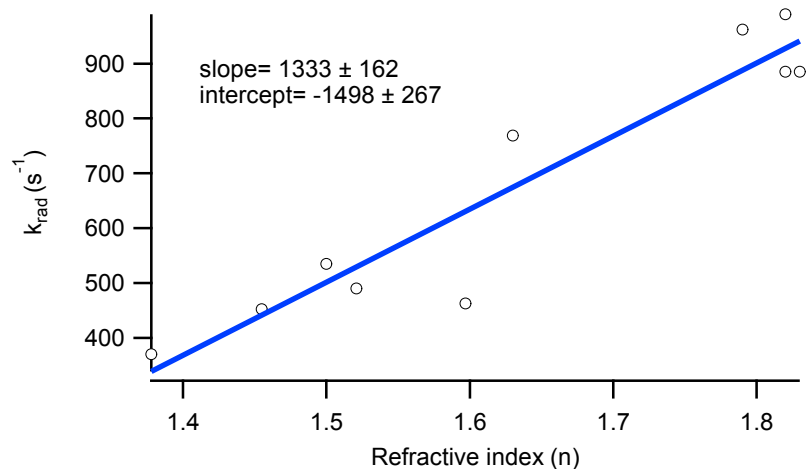

**Figure S3.** Empirical fit of all the data in Table S1 to a line function.

The preceding discussion applies only to  $k_{rad}$  values in bulk materials. For nanomaterials, the effect of solvent on  $k_{rad}$  must be considered separately.<sup>2</sup> The solvent effect will only be significant, however, for cases in which the refractive index of the solvent and sample differ markedly.

(1) Page, R. H.; Schaffers, K. I.; Waide, P. A.; Tassano, J. B.; Payne, S. A.; Krupke, W. F.; Bischel, W. K. Upconversion-pumped luminescence efficiency of rare-earth-doped hosts sensitized with trivalent ytterbium. *J Opt Soc Am B* **1998**, *15*, 996-1008.

(2) Senden, T.; Rabouw, F. T.; Meijerink, A. Photonic Effects on the Radiative Decay Rate and Luminescence Quantum Yield of Doped Nanocrystals. *ACS Nano* **2015**, *9*, 1801-1808.

(3) Glauber, R. J.; Lewenstein, M. Quantum optics of dielectric media. *Physical Review A* **1991**, *43*, 467-491.
